# Supplementary material for: Structural identification of an HER2 receptor model binding pocket to optimize lead compounds: a combined experimental and computational approach
Source: Royal Society of Chemistry journal article supplement (doi:10.1039/c6mb00158k), 2016-04-13
Supplement: c6mb00158k1.pdf [file c6mb00158k1.pdf]

# Structural identification of HER2 receptor model binding pocket to optimize lead compounds: a combined experimental and computational approach

Emma Langella,<sup>†,§</sup> Enrica Calce,<sup>†,§</sup> Michele Saviano,<sup>‡,\*</sup> and Stefania De  
Luca<sup>†,\*</sup>

<sup>†</sup> Institute of Biostructures and Bioimaging, National Research Council, Via Mezzocannone 16,  
80134 Naples, Italy

<sup>‡</sup> Institute of Crystallography, National Research Council, Via Amendola 122/O, 70126 Bari, Italy

[stefania.deluca@cnr.it](mailto:stefania.deluca@cnr.it); [msaviano@unina.it](mailto:msaviano@unina.it)

## Supporting Information

### Table of contents

|                                               |    |
|-----------------------------------------------|----|
| <b>1. LC-MS spectra of mutated HER2-DIVMP</b> | S2 |
| <b>2. CD spectra of mutated HER2-DIVMP</b>    | S4 |
| <b>3. MD analysis</b>                         | S5 |

# 1. LC-MS spectra of mutated HER2-DIVMP

## HER2-DIVMP(K569G)

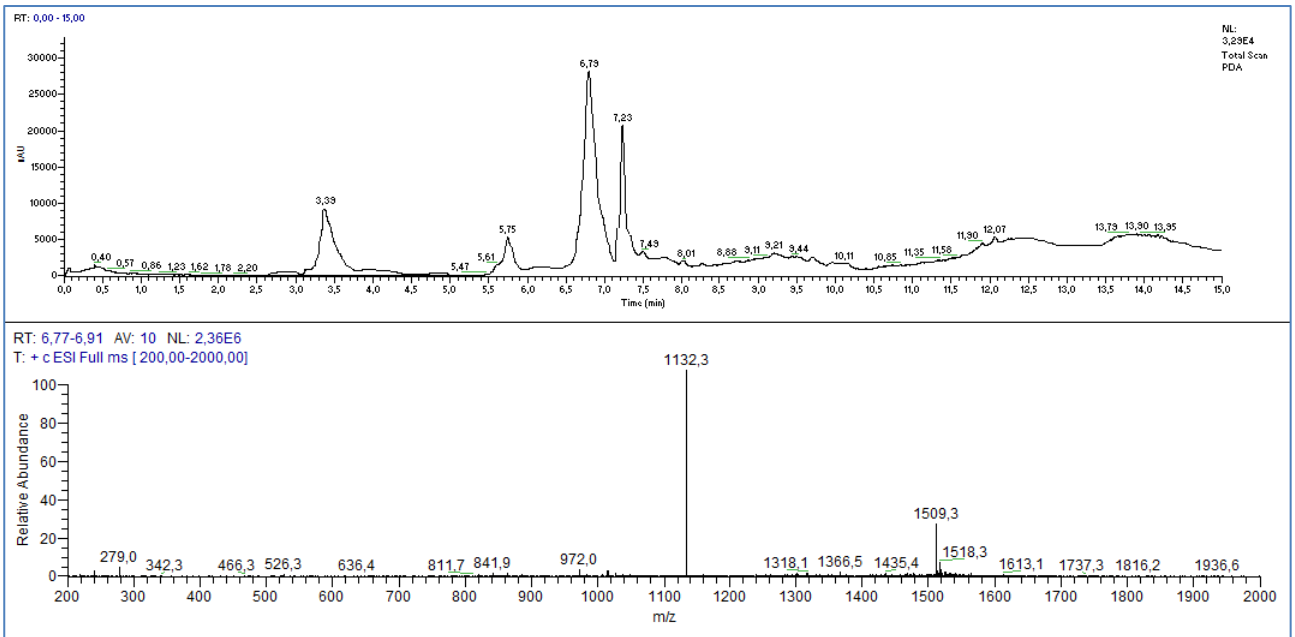

## HER2-DIVMP(E598G)

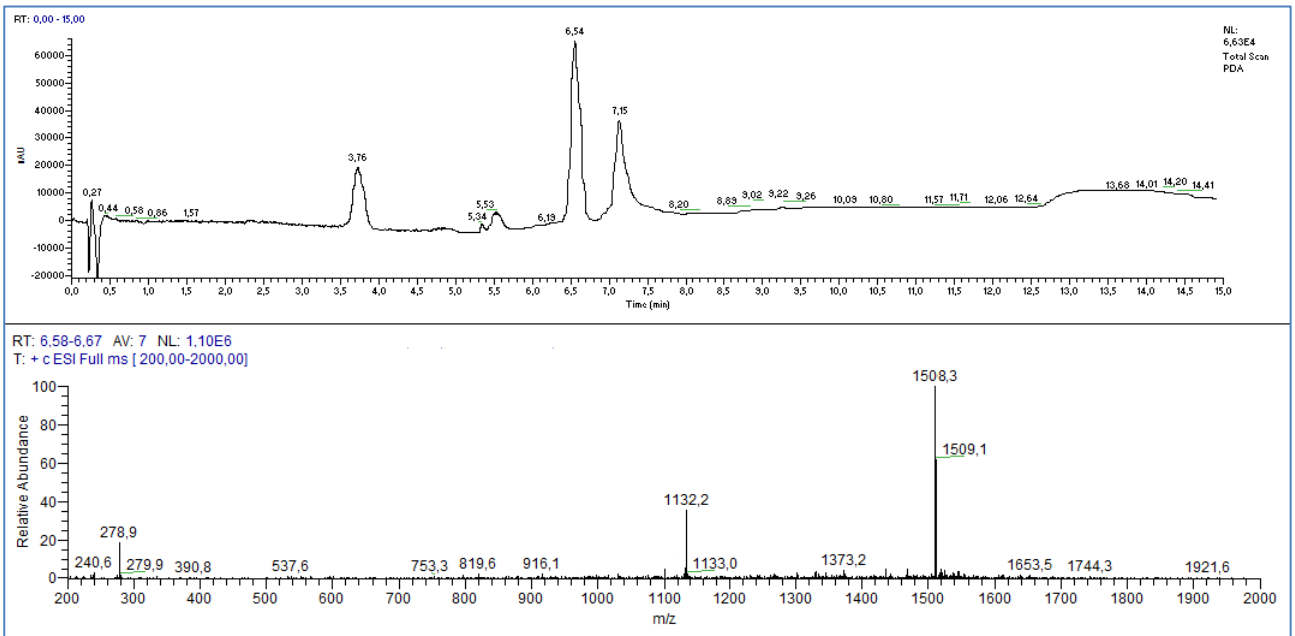

# HER2-DIVMP(K569G;E598G)

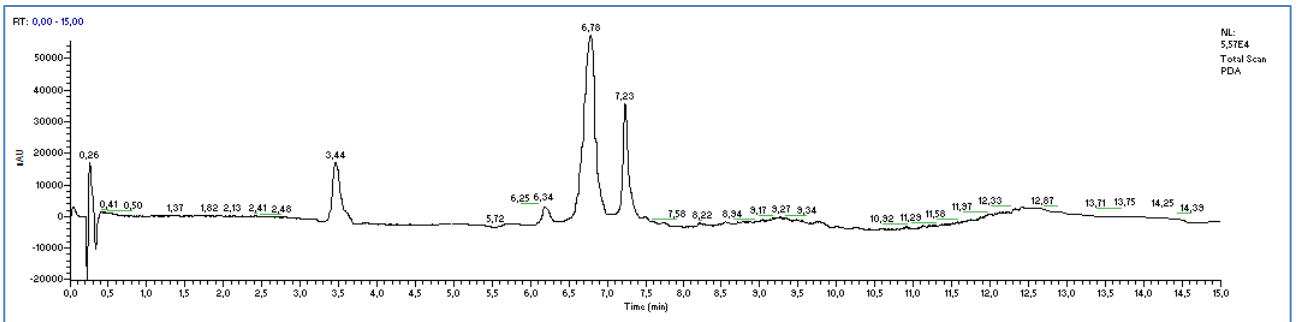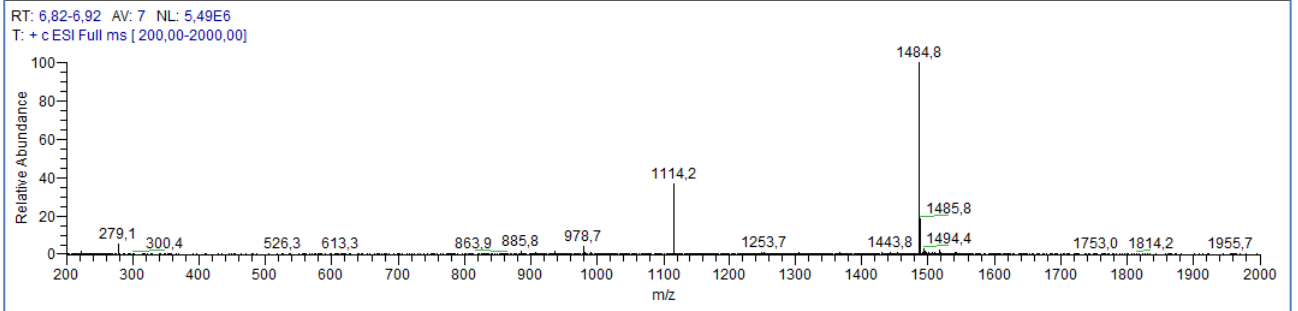

**2. CD spectra of mutated HER2-DIVMP**

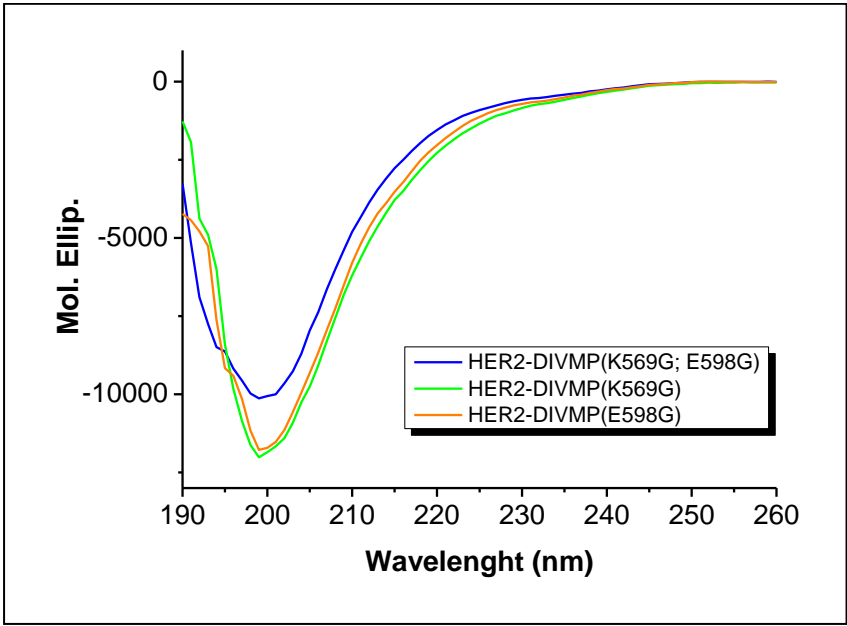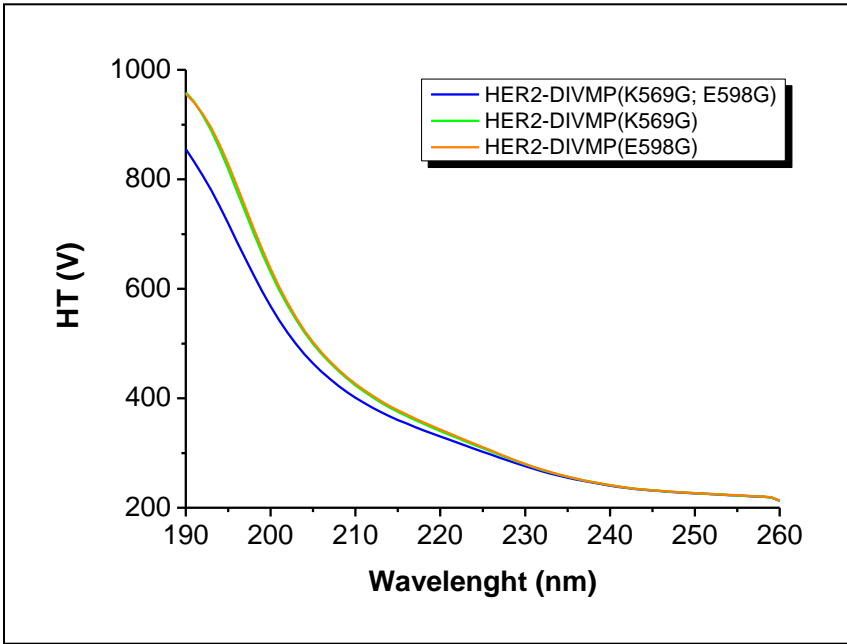

### 3. MD analysis

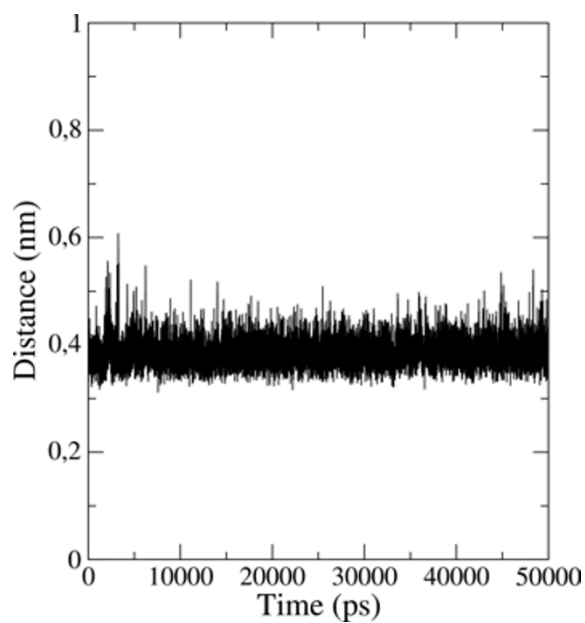

**Figure S1.** Distance between the side chains of K569 (CG, CD atoms) and V29 (CG1, CG2 atoms) computed along the simulation for model\_docking system.

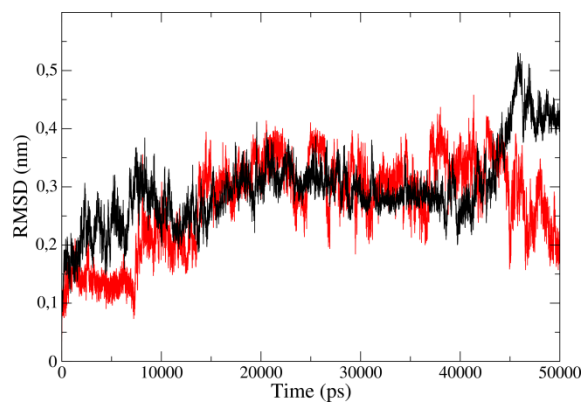

**Figure S2.** Root mean square deviation (RMSD) of the C $\alpha$  carbon atoms positions as a function of time for model\_docking\_seed simulation. HER2-DIVMP (black line) and A9 (red line).

**Table S1:** Percentage of occurrence (%) of hydrogen bonds between A9 and HER2-DIVMP in model\_RX are estimated using 30000 MD trajectory frames (only values above 10% are reported)

| A9           | HER2-DIVMP    | %    |
|--------------|---------------|------|
| GLN 27 (OE1) | LYS 569 (HZ3) | 14.9 |
| VAL 29 ( H ) | GLU 598 ( O ) | 39.4 |
| ASN 30 ( H ) | GLU 598 ( O ) | 13.8 |
| ASN 30 (D22) | GLU 597 ( O ) | 22.1 |
| ALA 34 ( H ) | ALA 566 ( O ) | 12.8 |
| ALA 34 ( H ) | CYS 565 ( O ) | 35.8 |

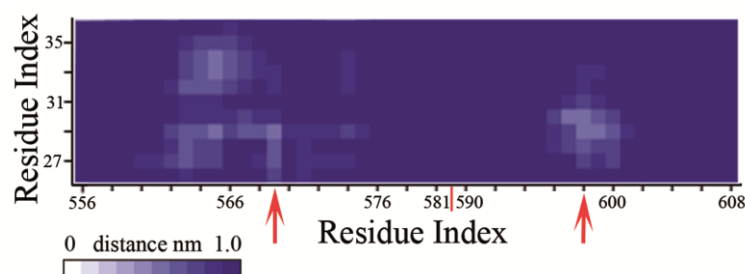

**Figure S3.** Graphical map of the contacts between A9 and HER2-DIVMP in model\_docking\_seed system. The regions of the receptor involved in ligand binding during the simulation time are colored by the average of the distance. Red arrows indicate the positions of K569 and E598.

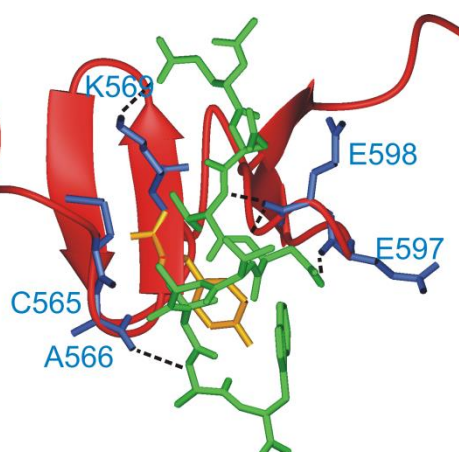

**Figure S4.** MD representative structure for the model\_docking\_seed system. HER2-DIVMP is displayed as red cartoon; A9 peptide residues are displayed in green sticks. HER2 residues involved into interaction with A9 are labeled and represented as blue sticks.
